# Supplementary material for: A chiral coordination polymer with double coaxially nested helical chains exhibiting spin-canting antiferromagnetism
Source: Royal Society of Chemistry journal article supplement (doi:10.1039/c5ce01378j), 2015-01-01
Supplement: c5ce01378j1.pdf [file c5ce01378j1.pdf]

## Electronic Supplementary Information

### **A chiral coordination polymer with double coaxially nested helical chains exhibiting spin-canting antiferromagnetism**

**Hui-Jie Lun<sup>a</sup>, Sa-Sa Cui<sup>a</sup>, Hai-Jiao Li<sup>a</sup>, Qi Ping<sup>a</sup>, Hao-Han Song<sup>a</sup>, Ya-Min Li<sup>\*,a</sup>, Yu Ru<sup>a</sup>,  
Yan-Long Bai<sup>a</sup> and Sheng-Chang Xiang<sup>\*,b</sup>**

*<sup>a</sup> Henan Key Laboratory of Polyoxometalate, Institute of Molecular and Crystal Engineering, College of Chemistry and Chemical Engineering, Henan University, Kaifeng, Henan, 475004, China.*

*<sup>b</sup> Fujian Provincial Key Laboratory of Polymer Materials, College of Chemistry and Chemical Engineering, Fujian Normal University, Fuzhou, Fujian, 350007, China.*

## Experimental Section

### Materials and Physical Measurements

All materials were commercially available and used as received. Infrared spectrum was recorded on a Bruker VERTEX-70 FT-IR spectrophotometer using a KBr pellet in the range of 400~4000  $\text{cm}^{-1}$ . Elemental analyses were performed *via* Vario EL III Etro Elemental Analyzer. The solid-state circular dichroism (CD) spectrum was recorded on a MOS-450 Spectrometer with a KBr pellet. Thermogravimetric analysis (TGA) was performed in  $\text{N}_2$  atmosphere with a heating rate of 10  $^{\circ}\text{C}/\text{min}^{-1}$  using TGA/SDTA851e. Powder X-ray diffraction (PXRD) pattern was recorded on a Philips X'PertPro instrument with  $\text{CuK}\alpha$  radiation ( $\lambda = 1.54056 \text{ \AA}$ ) in the range  $2\theta = 5\text{--}50^{\circ}$  at room temperature. Magnetic measurements were carried out on a Quantum Design MPMS-XL SQUID magnetometer.

### Crystallographical Section

X-ray single crystal data were collected at 296(2) K on a Bruker Apex-II CCD detector diffractometer with  $\text{MoK}\alpha$  radiation ( $\lambda = 0.71073 \text{ \AA}$ ). Data reduction and absorption collection were made with empirical methods. The structures were solved by direct methods using SHELXS-97<sup>1</sup> and refined by full-matrix least-squares techniques using SHELXL-97.<sup>2</sup> Anisotropic displacement parameters were refined for most non-hydrogen atoms. And all hydrogen atoms bonded to C atoms were added in the riding model while the  $u_2$ -OH hydrogen atoms were located from the difference Fourier maps. As well, a D-camphoric acid ligand was disordered and C13, C14, C16 atoms in carbon ring and C17, C19 atoms in methyl were treated as two parts with occupancy of 50%, respectively. The crystal data and refinement details for compound **1** are listed in Table S1. The selected bond lengths and angles are listed in Table S2.

**Table S1** Crystallographic data for compound **1**.

| Compound                                                  | <b>1</b>                                                        |
|-----------------------------------------------------------|-----------------------------------------------------------------|
| Empirical formula                                         | C <sub>50</sub> H <sub>78</sub> Ni <sub>3</sub> O <sub>22</sub> |
| Formula weight                                            | 1207.25                                                         |
| Crystal system                                            | Orthorhombic                                                    |
| Space group                                               | <i>P</i> 2 <sub>1</sub> 2 <sub>1</sub> 2 <sub>1</sub>           |
| <i>a</i> (Å)                                              | 12.4370(6)                                                      |
| <i>b</i> (Å)                                              | 14.0606(7)                                                      |
| <i>c</i> (Å)                                              | 32.3952(16)                                                     |
| $\alpha$ (°)                                              | 90.00                                                           |
| $\beta$ (°)                                               | 90.00                                                           |
| $\gamma$ (°)                                              | 90.00                                                           |
| <i>V</i> (Å <sup>3</sup> )                                | 5665.0(5)                                                       |
| <i>Z</i>                                                  | 4                                                               |
| <i>T</i> (K)                                              | 296(2)                                                          |
| <i>D<sub>c</sub></i> (g cm <sup>-3</sup> )                | 1.415                                                           |
| $\mu$ (mm <sup>-1</sup> )                                 | 1.063                                                           |
| Flack parameter                                           | 0.05(3)                                                         |
| <i>F</i> (000)                                            | 2552                                                            |
| $\theta$ limits (°)                                       | 1.58 to 25.00                                                   |
| Ref. collected                                            | 9927                                                            |
| Ref. unique                                               | 8442                                                            |
| <i>R</i> <sub>int</sub>                                   | 0.0315                                                          |
| <i>R</i> index [ <i>I</i> > 2 $\sigma$ ( <i>I</i> )]      | <i>R</i> <sub>1</sub> = 0.0618, <i>wR</i> <sub>2</sub> = 0.1562 |
| <i>R</i> (all data)                                       | <i>R</i> <sub>1</sub> = 0.0742, <i>wR</i> <sub>2</sub> = 0.1622 |
| GOOF                                                      | 1.057                                                           |
| $\Delta\rho_{\max}/\Delta\rho_{\min}$ (eÅ <sup>-3</sup> ) | 1.090/-1.346                                                    |

$$R = \frac{\sum(|F_o| - |F_c|)}{\sum|F_o|}, \quad wR = \left\{ \frac{\sum w[(F_o^2 - F_c^2)^2]}{\sum w[(F_o^2)^2]} \right\}^{1/2}, \quad w = 1/[\sigma^2(F_o^2) + (aP)^2 + bP], \quad P = (F_o^2 + 2F_c^2)/3. \quad \mathbf{1}: a = 0.0535, b = 24.5694.$$

**Table S2** Selected bond lengths [Å] and angles [°] for compound **1**.

| Bond length (Å) |            |             |            |
|-----------------|------------|-------------|------------|
| Ni1–O8          | 1.993(5)   | Ni2–O16     | 2.072(4)   |
| Ni1–O6          | 2.016(5)   | Ni2–O4      | 2.078(4)   |
| Ni1–O10         | 2.029(4)   | Ni2–O18     | 2.119(5)   |
| Ni1–O12         | 2.038(4)   | Ni3–O5      | 1.996(4)   |
| Ni1–O22         | 2.078(4)   | Ni3–O11     | 2.022(4)   |
| Ni1–O21         | 2.083(5)   | Ni3–O20     | 2.044(4)   |
| Ni2–O7          | 1.990(5)   | Ni3–O22     | 2.072(4)   |
| Ni2–O9          | 2.056(4)   | Ni3–O2      | 2.080(5)   |
| Ni2–O21         | 2.080(5)   | Ni3–O14     | 2.143(5)   |
| Bond angles (°) |            |             |            |
| O8–Ni1–O6       | 178.7(2)   | O21–Ni2–O4  | 171.39(18) |
| O8–Ni1–O12      | 87.8(2)    | O16–Ni2–O4  | 81.22(18)  |
| O6–Ni1–O12      | 91.1(2)    | O7–Ni2–O18  | 178.01(19) |
| O8–Ni1–O10      | 93.3(2)    | O9–Ni2–O18  | 87.13(19)  |
| O6–Ni1–O10      | 87.7(2)    | O21–Ni2–O18 | 86.51(18)  |
| O12–Ni1–O10     | 177.7(2)   | O16–Ni2–O18 | 87.72(19)  |
| O8–Ni1–O22      | 83.37(18)  | O5–Ni3–O11  | 94.71(19)  |
| O6–Ni1–O22      | 97.38(18)  | O5–Ni3–O20  | 90.44(19)  |
| O12–Ni1–O22     | 90.27(18)  | O2–Ni3–O14  | 91.0(2)    |
| O10–Ni1–O22     | 87.88(19)  | O11–Ni3–O20 | 168.34(18) |
| O8–Ni1–O21      | 96.62(18)  | O5–Ni3–O22  | 94.66(18)  |
| O6–Ni1–O21      | 82.63(18)  | O11–Ni3–O22 | 99.16(17)  |
| O12–Ni1–O21     | 89.82(19)  | O20–Ni3–O22 | 90.82(18)  |
| O10–Ni1–O21     | 92.04(18)  | O5–Ni3–O2   | 88.1(2)    |
| O22–Ni1–O21     | 179.9(2)   | O11–Ni3–O2  | 88.85(19)  |
| O7–Ni2–O9       | 94.8(2)    | O20–Ni3–O2  | 80.86(18)  |
| O7–Ni2–O21      | 93.57(19)  | O22–Ni3–O2  | 171.28(18) |
| O9–Ni2–O21      | 99.31(17)  | O5–Ni3–O14  | 178.05(18) |
| O7–Ni2–O16      | 90.29(19)  | O11–Ni3–O14 | 86.97(18)  |
| O9–Ni2–O16      | 168.58(17) | O20–Ni3–O14 | 87.73(18)  |
| O21–Ni2–O16     | 90.54(17)  | O22–Ni3–O14 | 86.04(18)  |
| O7–Ni2–O4       | 89.0(2)    | Ni1–O21–Ni2 | 110.62(19) |
| O9–Ni2–O4       | 88.65(18)  | Ni1–O22–Ni3 | 110.75(19) |
| O4–Ni2–O18      | 90.63(19)  |             |            |

**Table S3** BVS analyses of Ni and  $u_2$ -O atoms for **1**

| Atoms      | Ni1              | Ni2              | Ni3              | $u_2$ -O21      | $u_2$ -O22      |
|------------|------------------|------------------|------------------|-----------------|-----------------|
| BVS        | 2.125            | 1.983            | 2.021            | 0.630           | 0.641           |
| Assignment | Ni <sup>2+</sup> | Ni <sup>2+</sup> | Ni <sup>2+</sup> | OH <sup>-</sup> | OH <sup>-</sup> |

The oxidation state of a particular atom can be taken as the nearest integer to the value. <sup>3</sup>

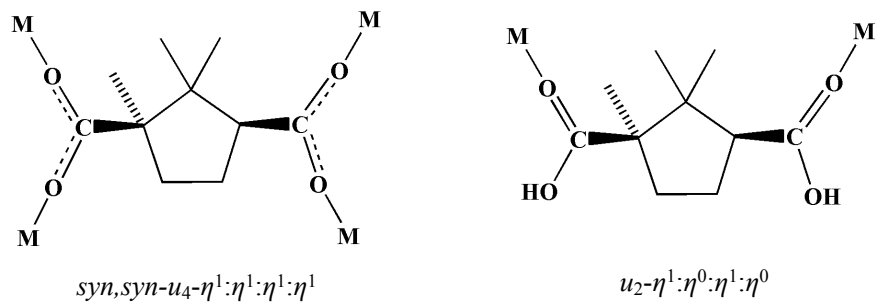

**Scheme 1** Coordination modes of D-camphoric acid ligand in compound **1**.

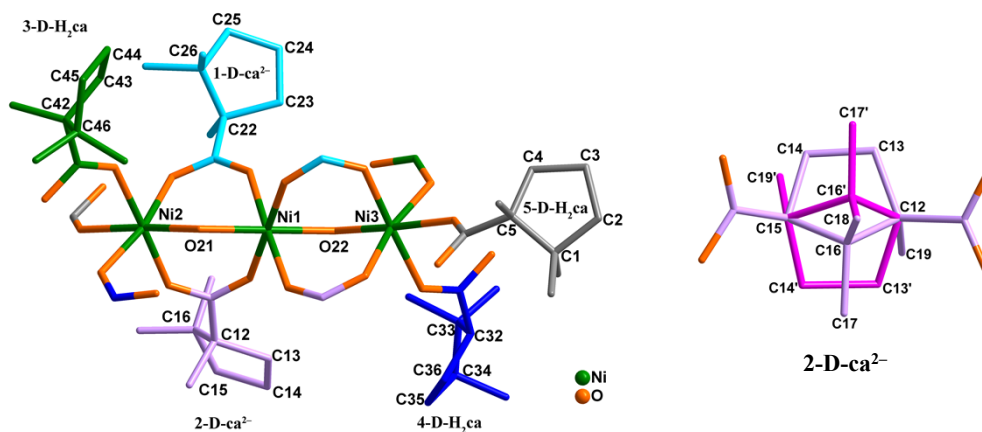

**Fig. S1** Left: the asymmetric unit of compound **1**. Right: the 2-D-ca<sup>2-</sup> is disordered and C13, C14, C16 in carbon ring as well as C17, C19 in methyl are treated as two parts with occupancy of 50% respectively in pink and rose red colors. H atoms are omitted.

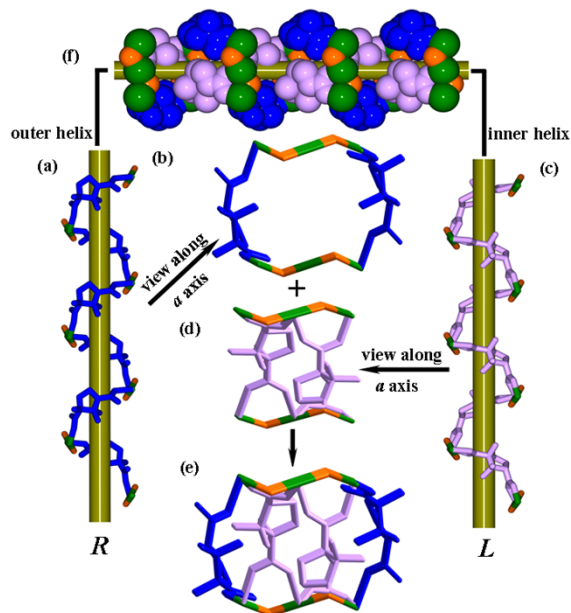

**Fig. S2** The other type of nested coaxially helices of compound **1**. Color Scheme: Ni green; O orange. The D-camphoric acid ligands are in blue and pink colors for clarity. H atoms are omitted.

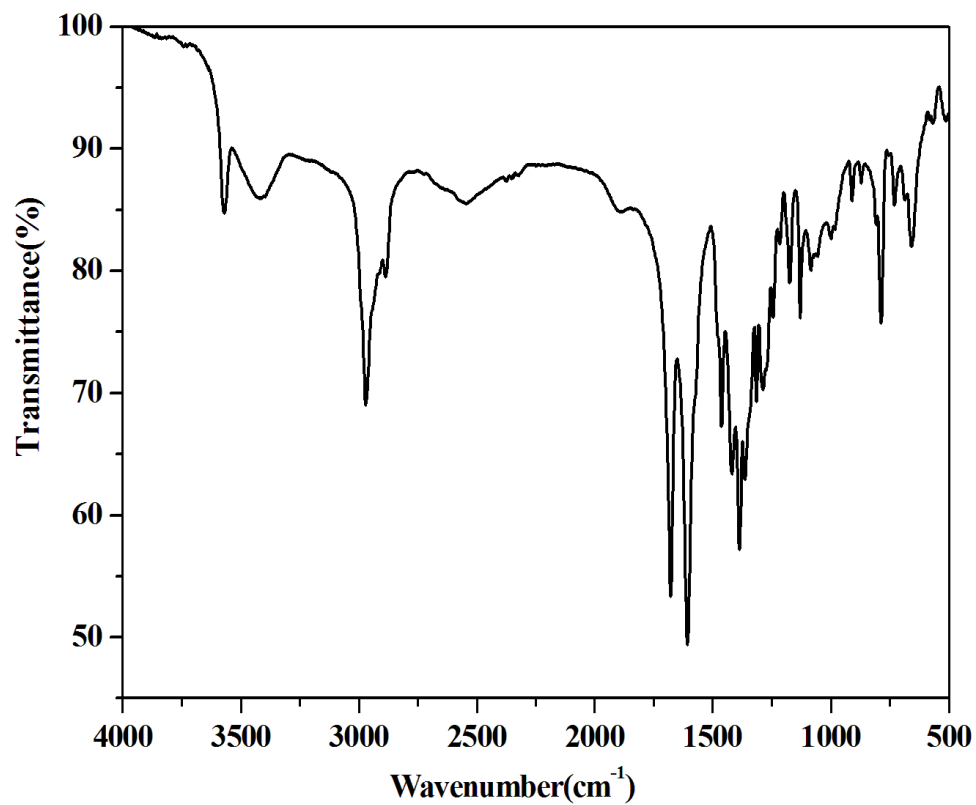

Fig. S3 IR spectrum for compound 1.

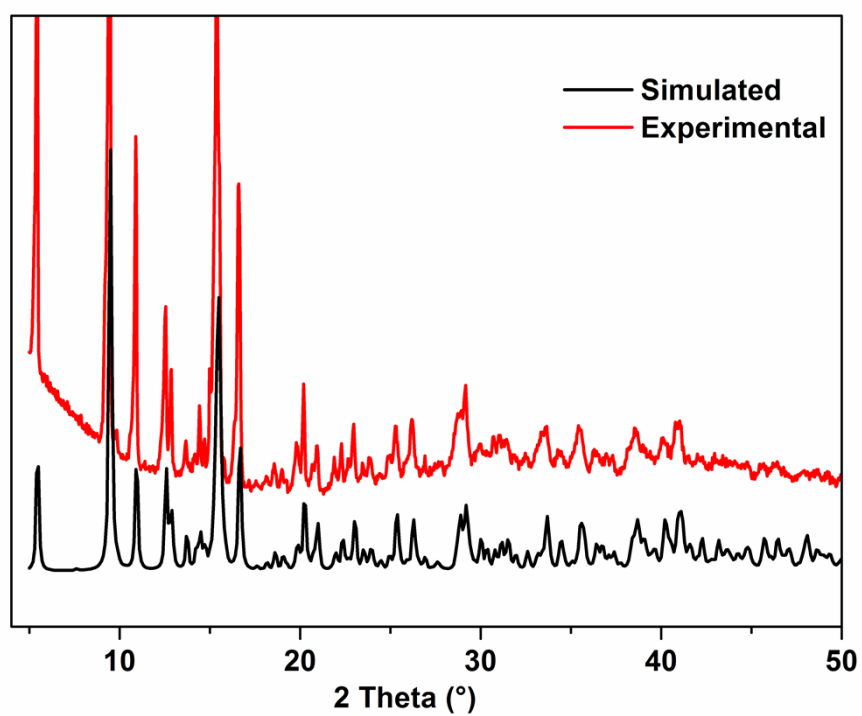

Fig. S4 PXRD curves for compound 1.

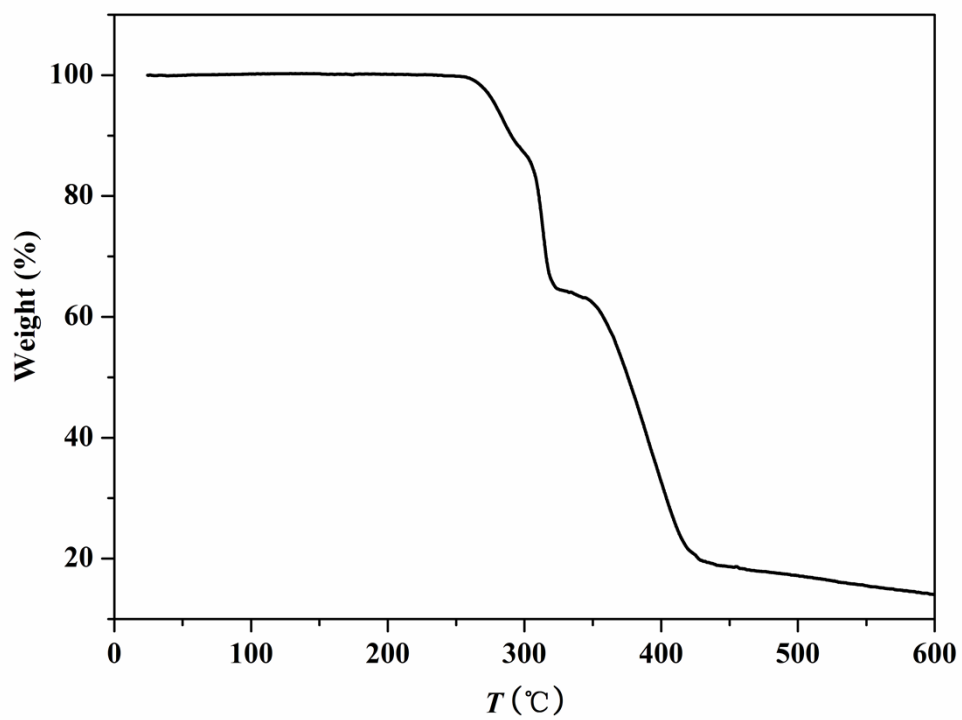

Fig. S5 TGA curve for compound 1.

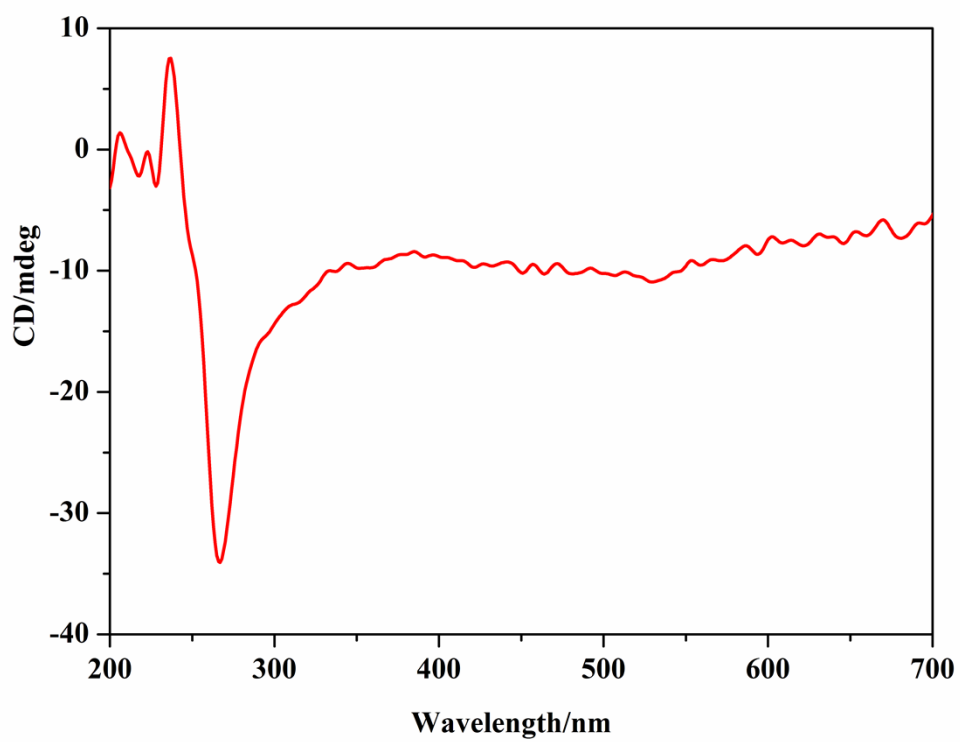

Fig. S6 CD spectrum of 1 in a KBr pellet.

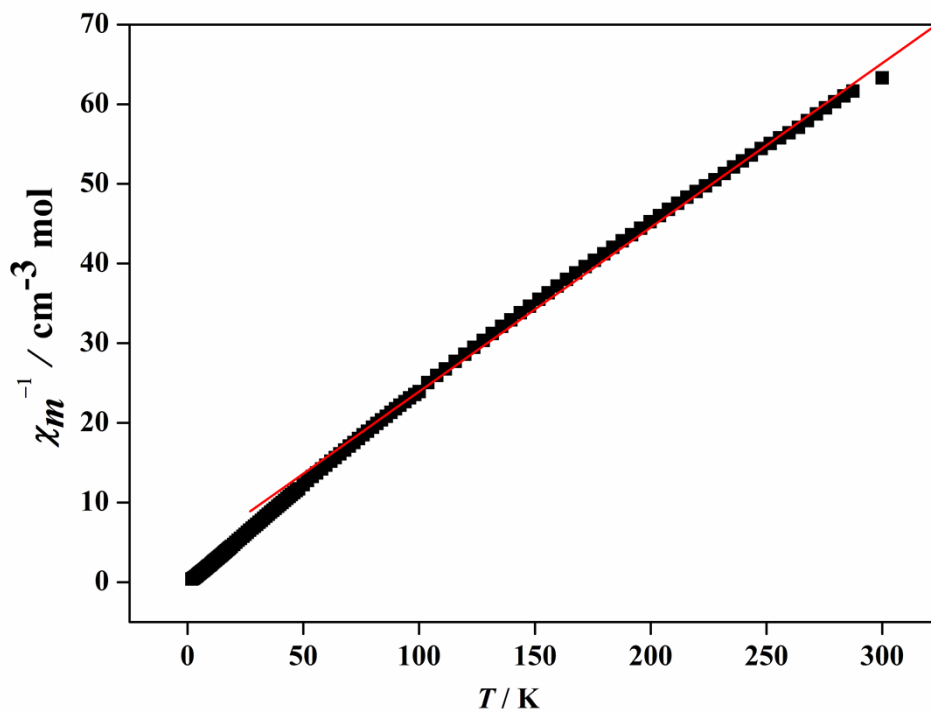

**Fig. S7** The  $\chi_m^{-1}$  vs.  $T$  plot of **1** in the range of 2–300 K at 1 kOe. The solid line is the best-fit above 80 K according to the Curie-Weiss law.

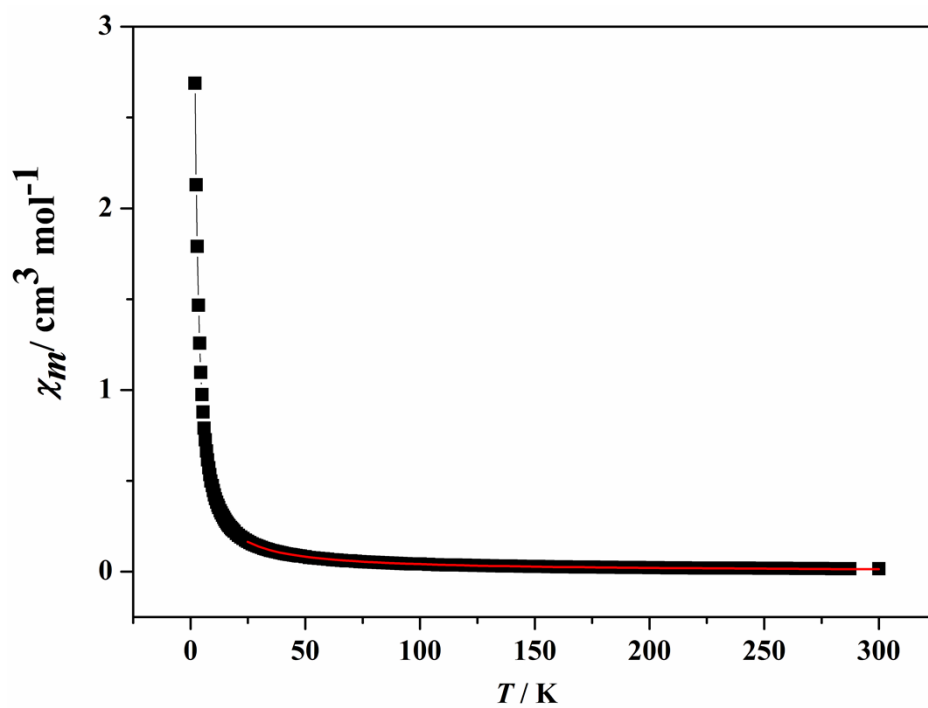

**Fig. S8** The  $\chi_m$  vs.  $T$  plot of **1** in the range 2–300 K at 1 kOe. The solid line is the best-fit above 25 K.



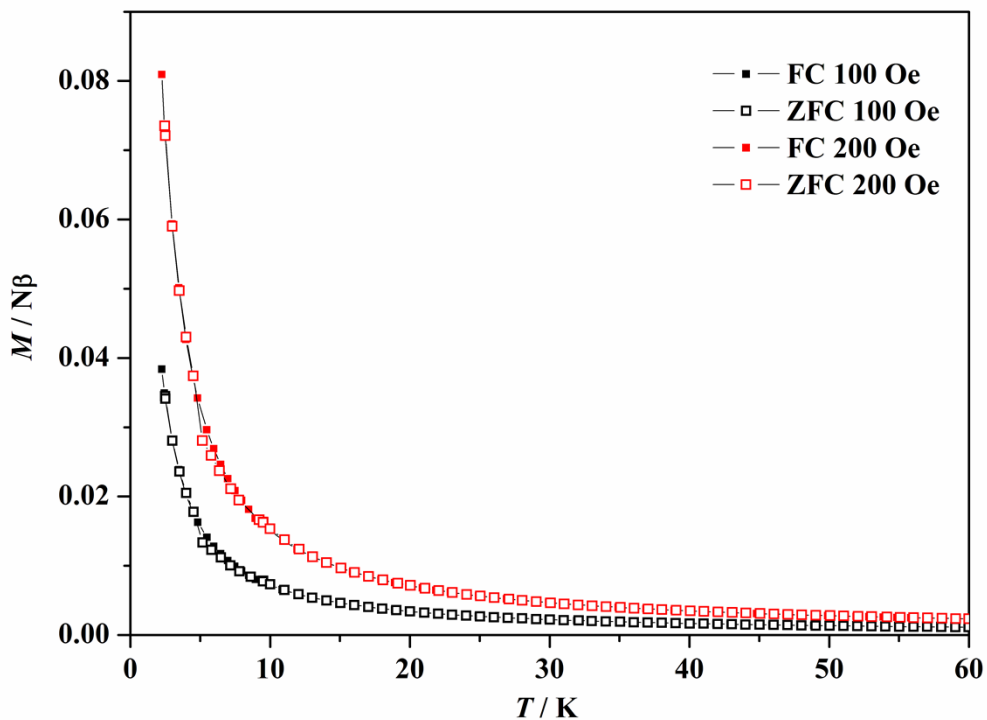

Fig. S9 FCM and ZFCM curves at 100 Oe and 200 Oe for 1.

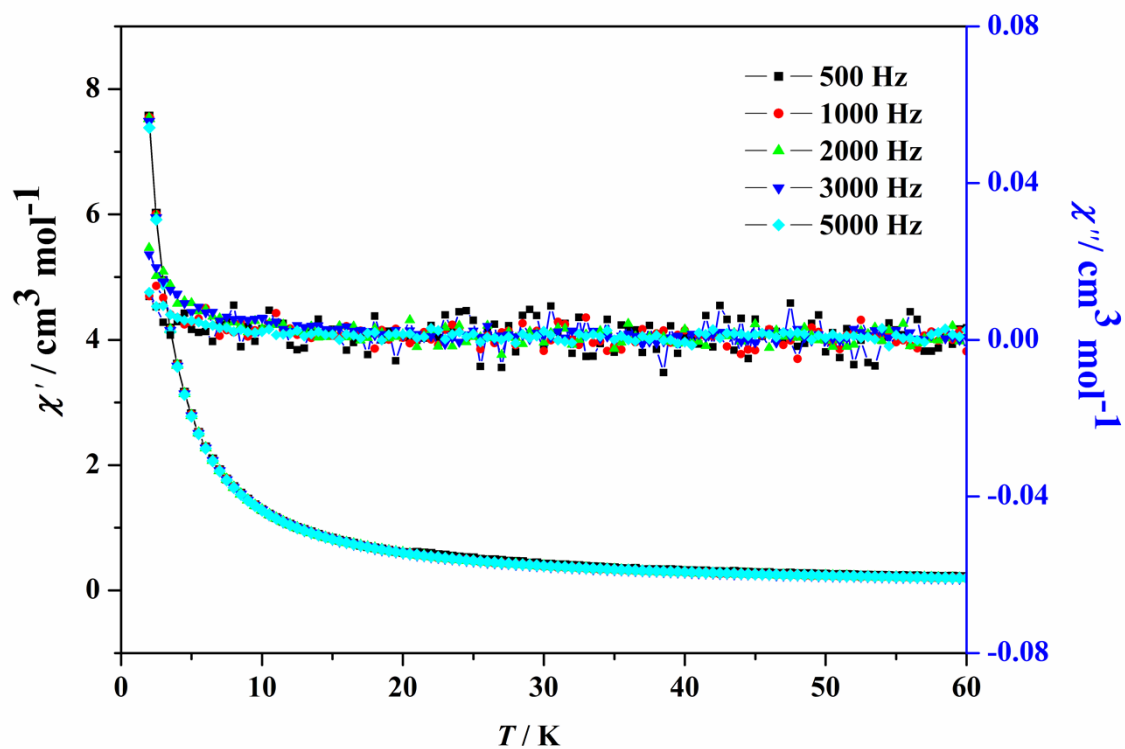

Fig. S10 Plots of the temperature dependence of the *ac* susceptibility  $\chi'$  and  $\chi''$  obtained at 3 Oe field for 1.

## References

- 1 G. M. Sheldrick, SHELXS-97, *Program for X-ray Crystal Structure Solution*, University of Göttingen, Göttingen, Germany, 1997.
- 2 G. M. Sheldrick, SHELXL-97, *Program for X-ray Crystal Structure Refinement*, University of Göttingen, Göttingen, Germany, 1997.
- 3 P. van der Sluis and A. L. Spek, *Acta Cryst.*, 1990, **A46**, 194–201.
